# Supplementary material for: Huisgen [3 + 2] Dipolar Cycloadditions of Phthalazinium Ylides to Activated Symmetric and Non-Symmetric Alkynes
Source: MDPI journal article supplement (doi:10.3390/molecules25194416), 2020-09-25
Supplement: s1 [file s1]

Supporting information for:

# Huisgen [3 + 2] Dipolar Cycloadditions of Phthalazinium Ylides to Activated Symmetric and Non-Symmetric Alkynes

Vasilichia Antoci <sup>1</sup>, Costel Moldoveanu <sup>1</sup>, Ramona Danac <sup>1</sup>, Violeta Mangalagiu <sup>2,\*</sup> and Gheorghita Zbancioc <sup>1,\*</sup>

<sup>1</sup> Alexandru Ioan Cuza University of Iasi, Faculty of Chemistry, 11 Carol 1st Bvd, Iasi -700506, Romania; vasilichia.antoci@uaic.ro (V.A.); costel.moldoveanu@uaic.ro (C.M.); rdanac@uaic.ro (R.D.); gheorghita.zbancioc@uaic.ro (G.Z.)

<sup>2</sup> Alexandru Ioan Cuza University of Iasi, Institute of Interdisciplinary Research- CERNESIM Centre, 11 Carol I, Iasi, 700506, Romania; violeta.mangalagiu@uaic.ro (V.M.)

\* Correspondence: gheorghita.zbancioc@uaic.ro (G.Z.); violeta.mangalagiu@uaic.ro (V.M.).

## Contents

|                                               |   |
|-----------------------------------------------|---|
| 1. NMR Spectra of the obtained compounds..... | 2 |
|-----------------------------------------------|---|

## 1. NMR Spectra of the obtained compounds.

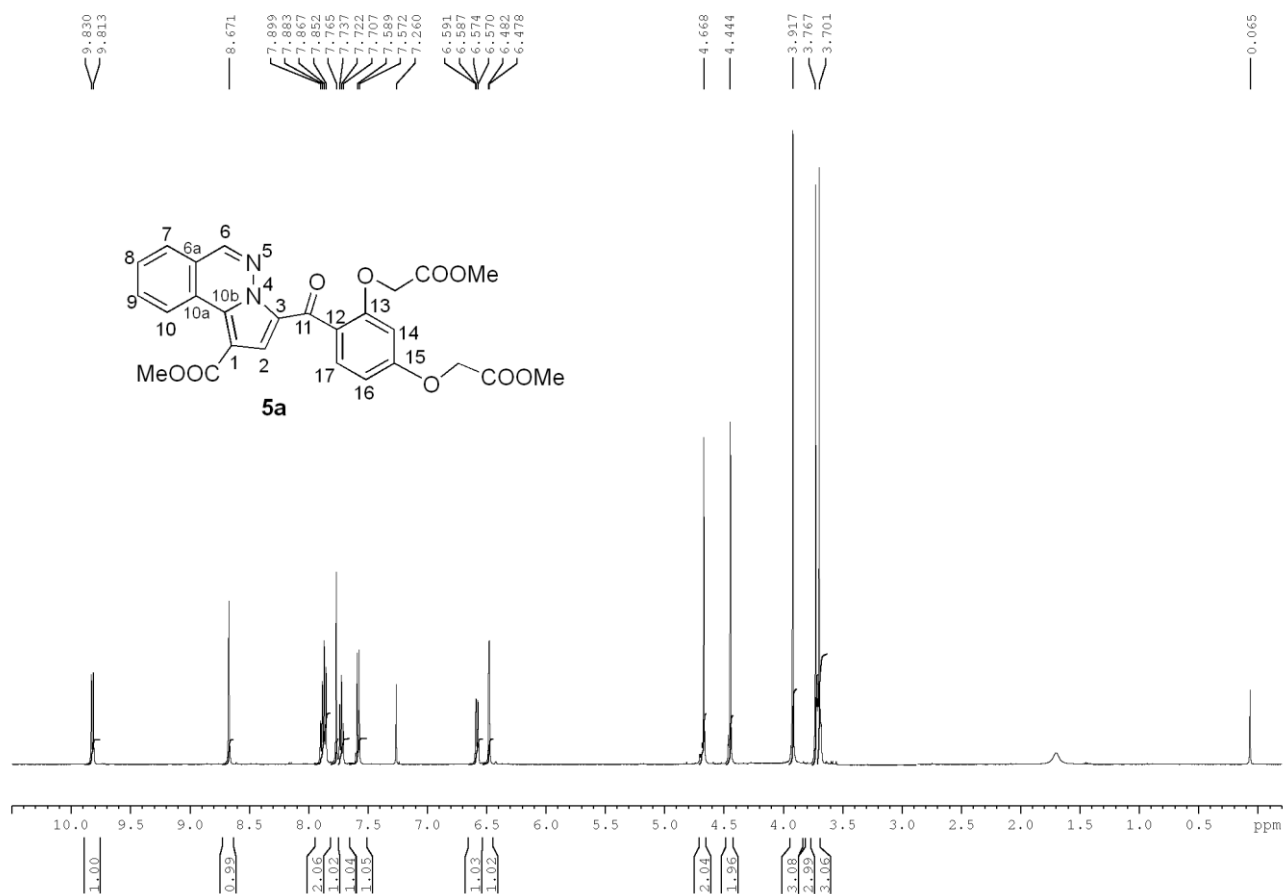

Figure S1: <sup>1</sup>H-NMR spectrum of the compound 5a.

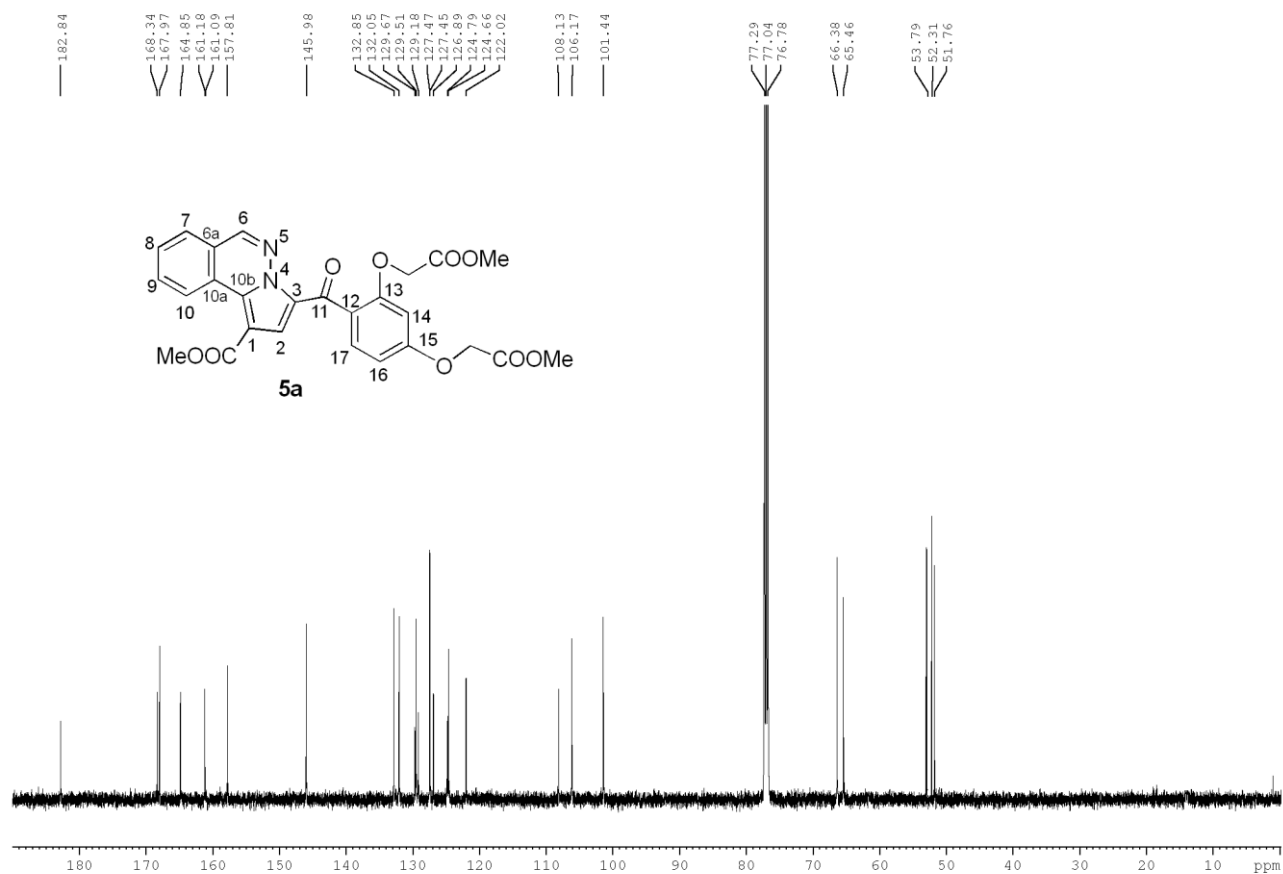

Figure S2: <sup>13</sup>C-NMR spectrum of the compound 5a.

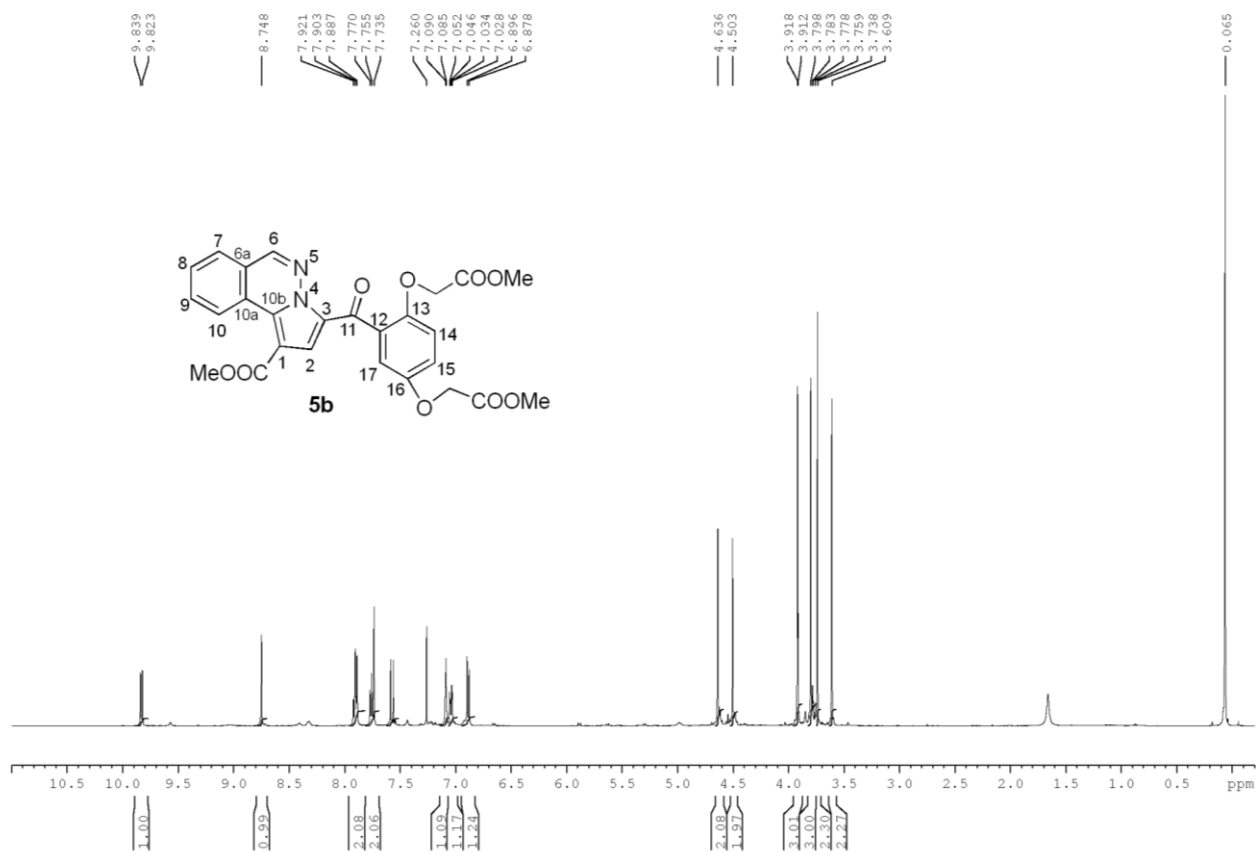

**Figure S3:** <sup>1</sup>H-NMR spectrum of the compound **5b**.

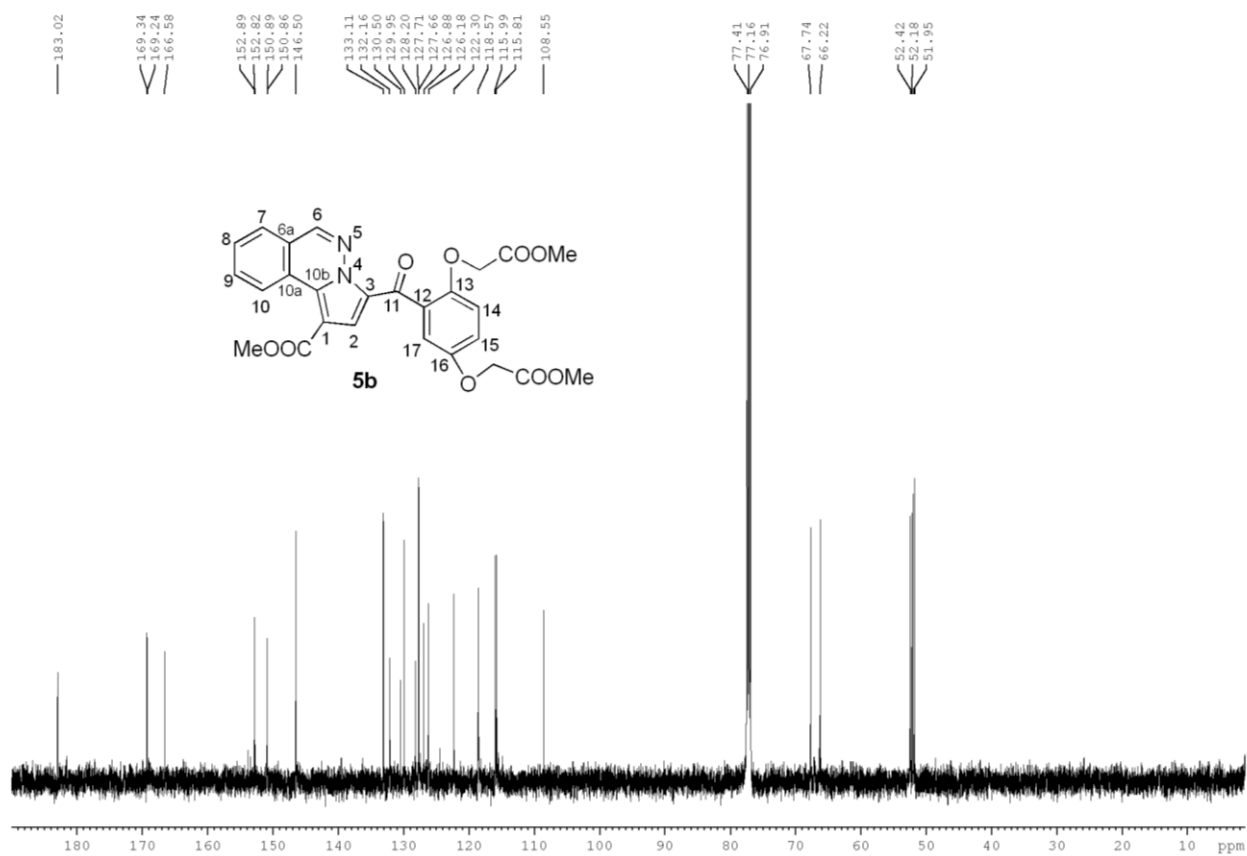

**Figure S4:** <sup>13</sup>C-NMR spectrum of the compound **5b**.



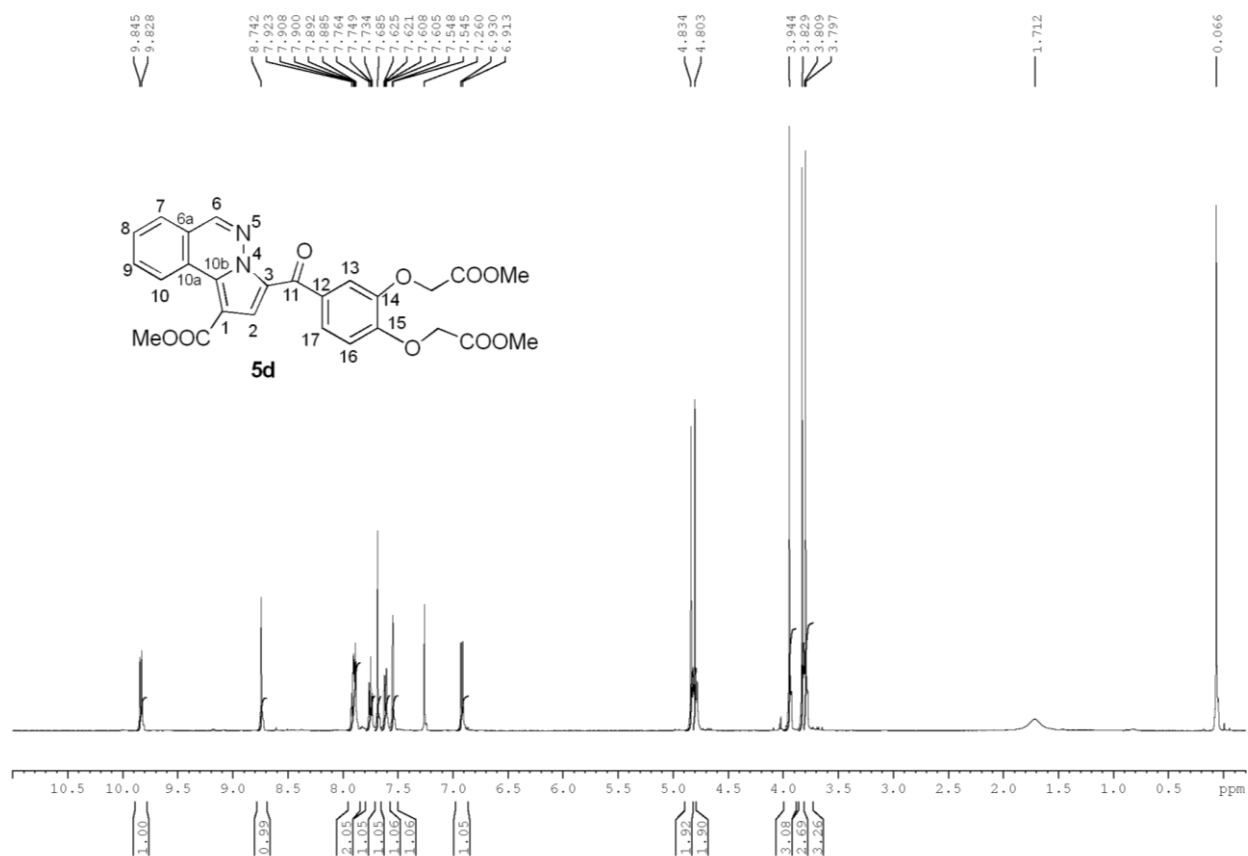

**Figure S7:** <sup>1</sup>H-NMR spectrum of the compound **5d**.

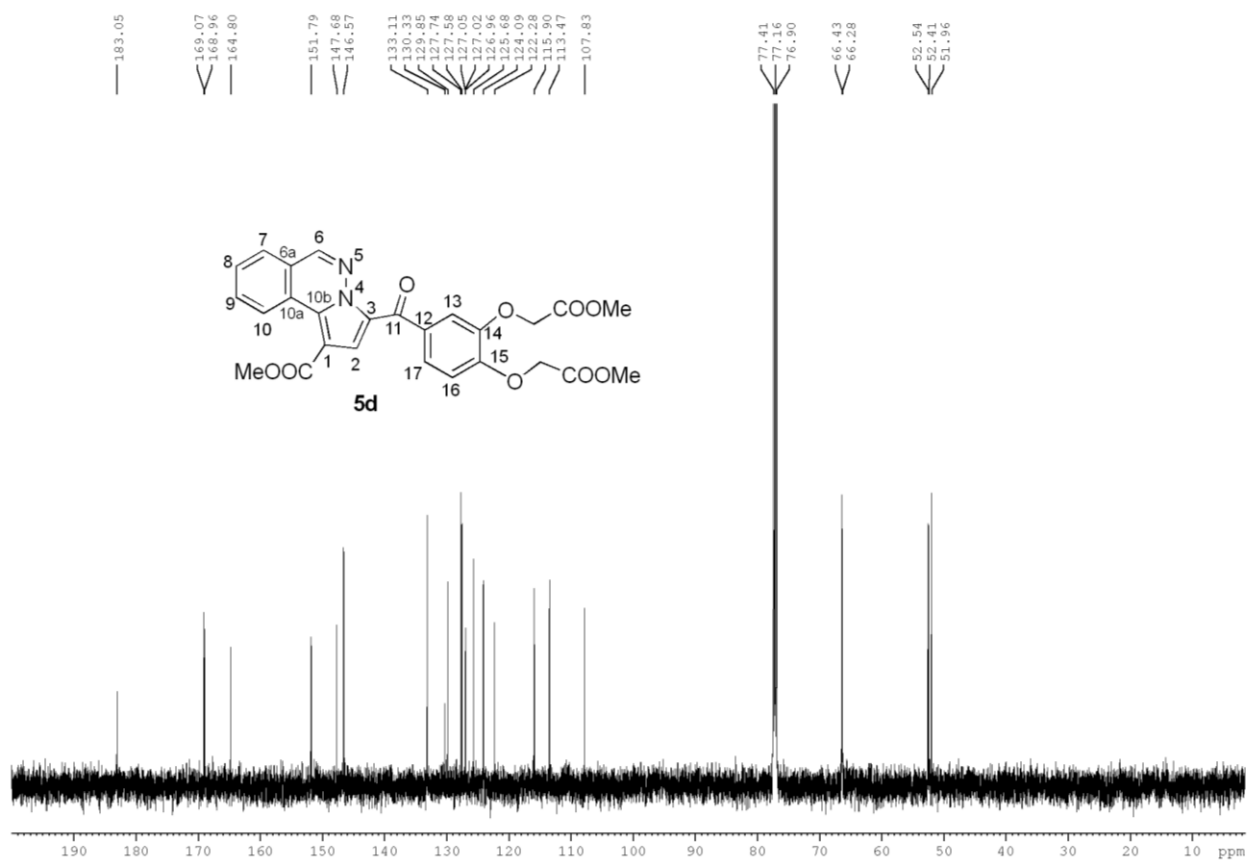

**Figure S8:** <sup>13</sup>C-NMR spectrum of the compound **5d**.

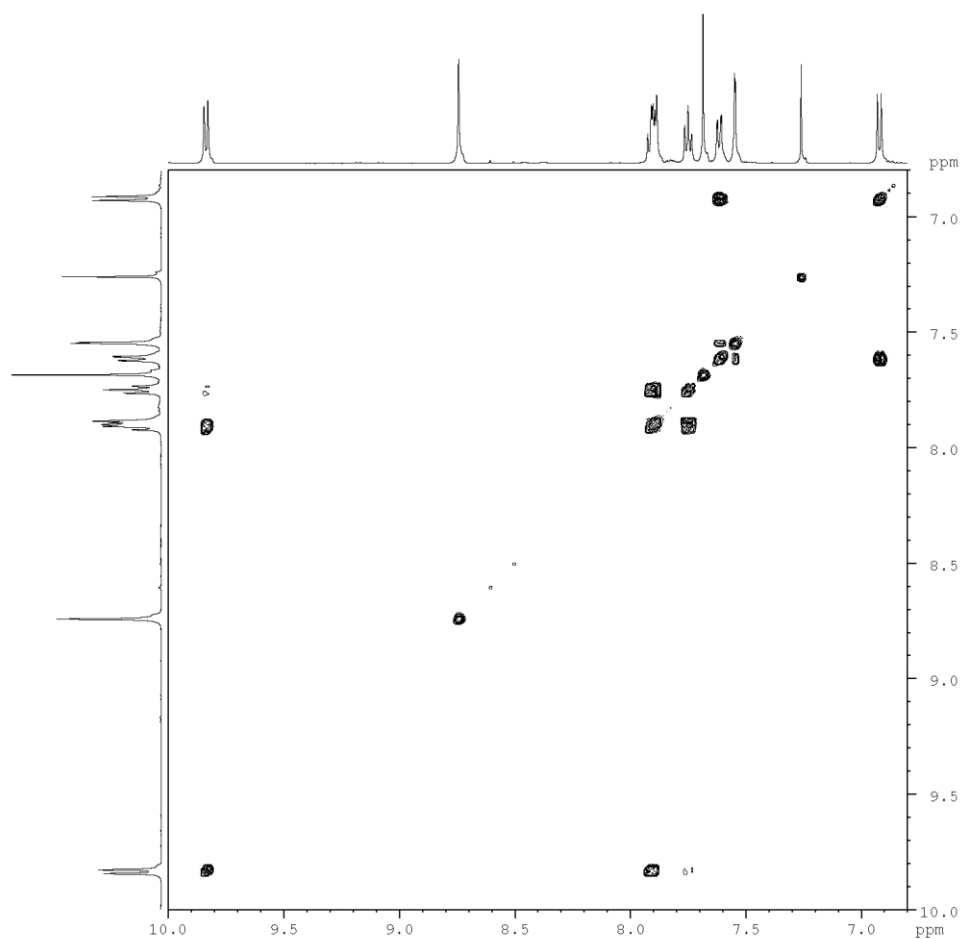

**Figure S9:** 2D-COSY 45 spectrum of the compound **5d**.

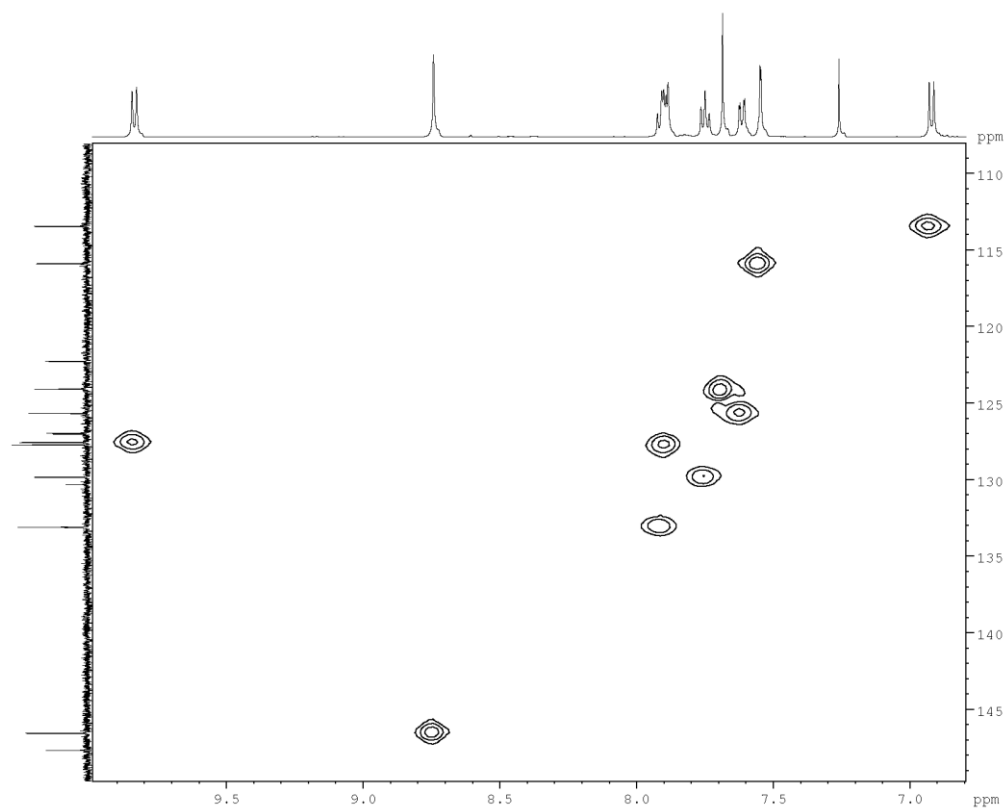

**Figure S10:** 2D-HETCOR (HMQC) spectrum of the compound **5d**.

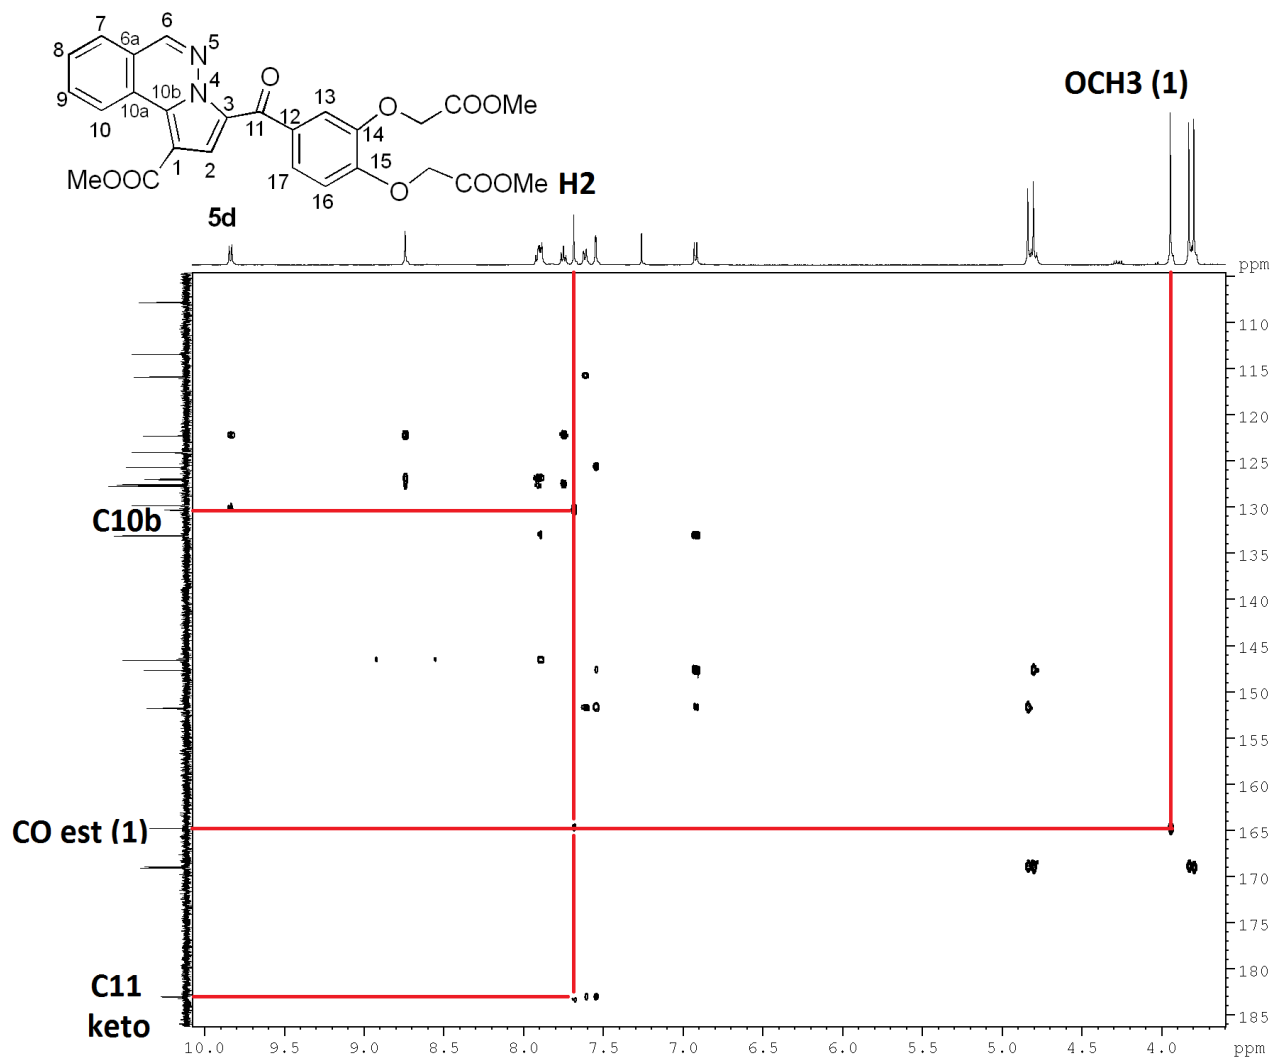

**Figure S11:** 2D-HETCOR (HMBC) spectrum of the compound **5d**.

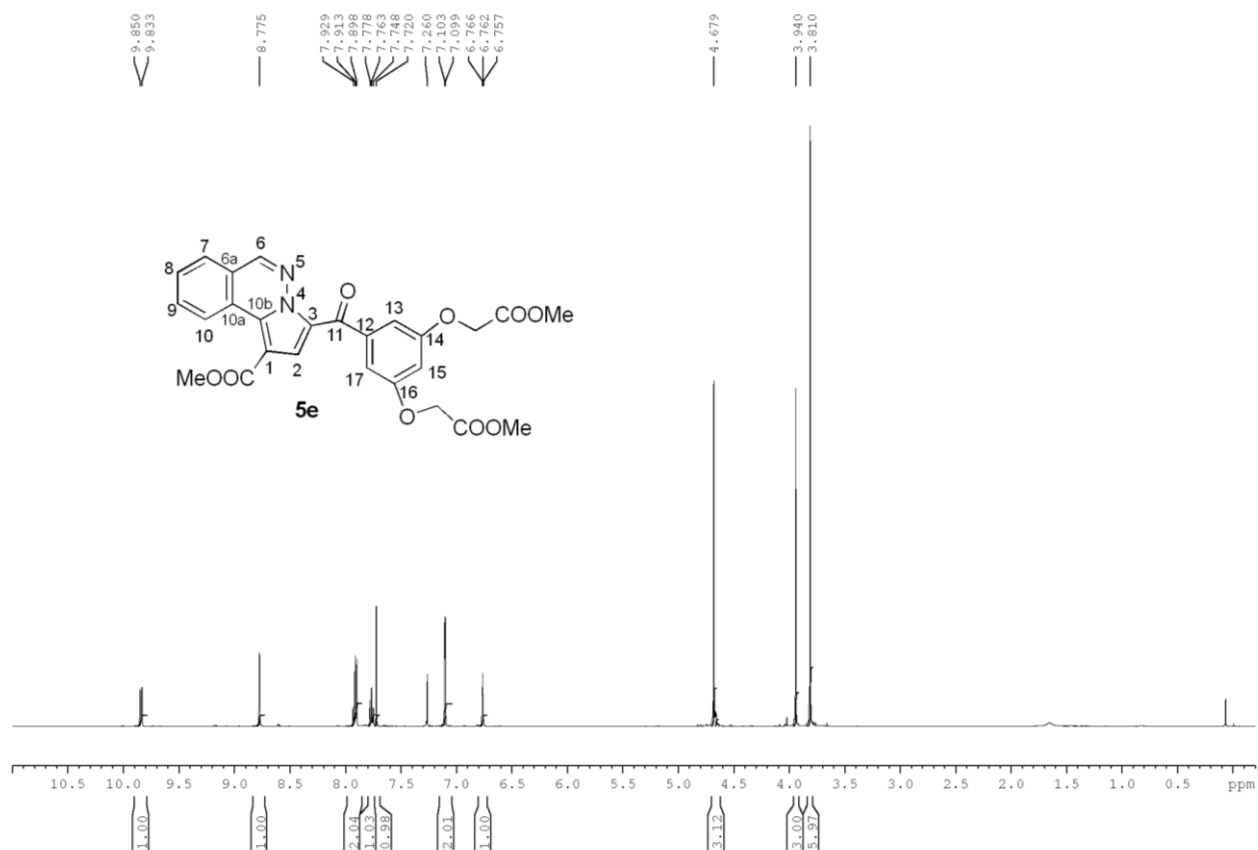

**Figure S12:** <sup>1</sup>H-NMR spectrum of the compound 5e.

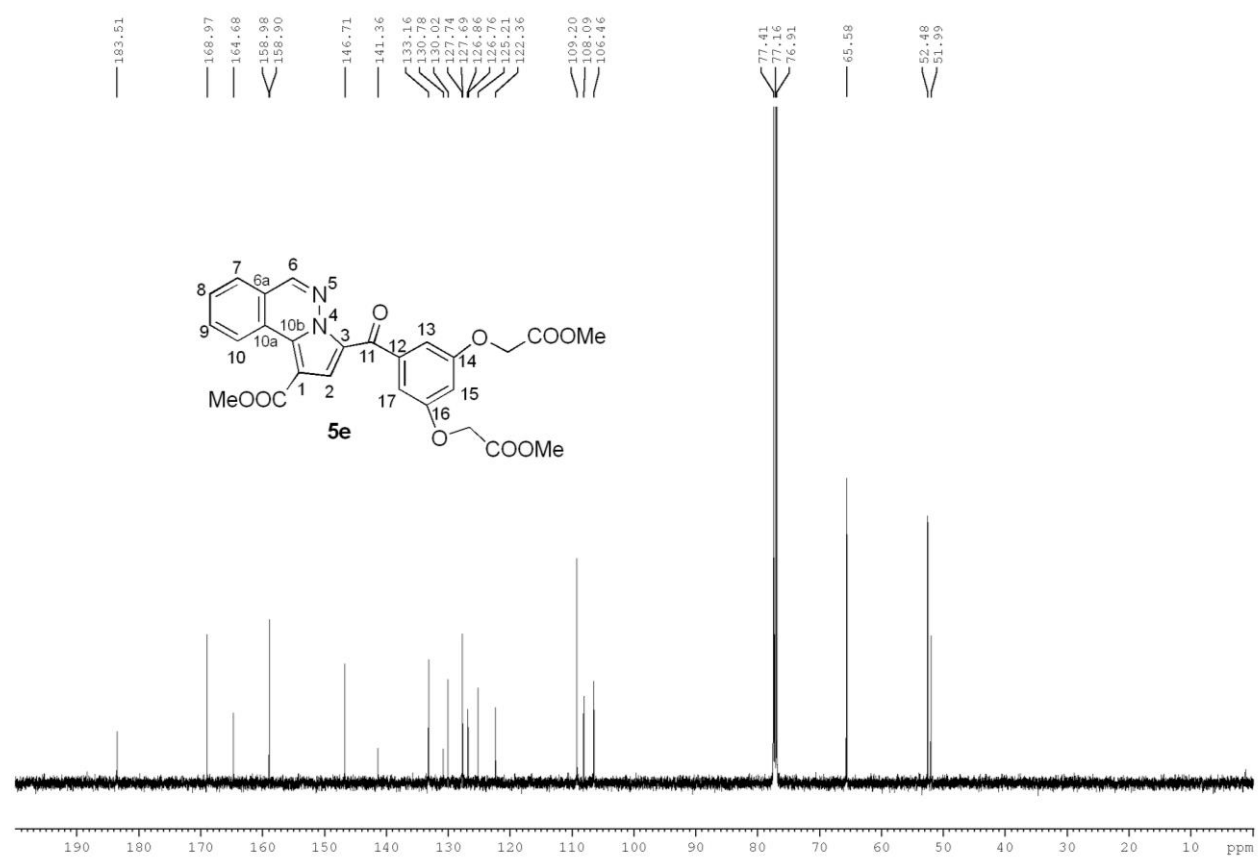

**Figure S13:** <sup>13</sup>C-NMR spectrum of the compound 5e.



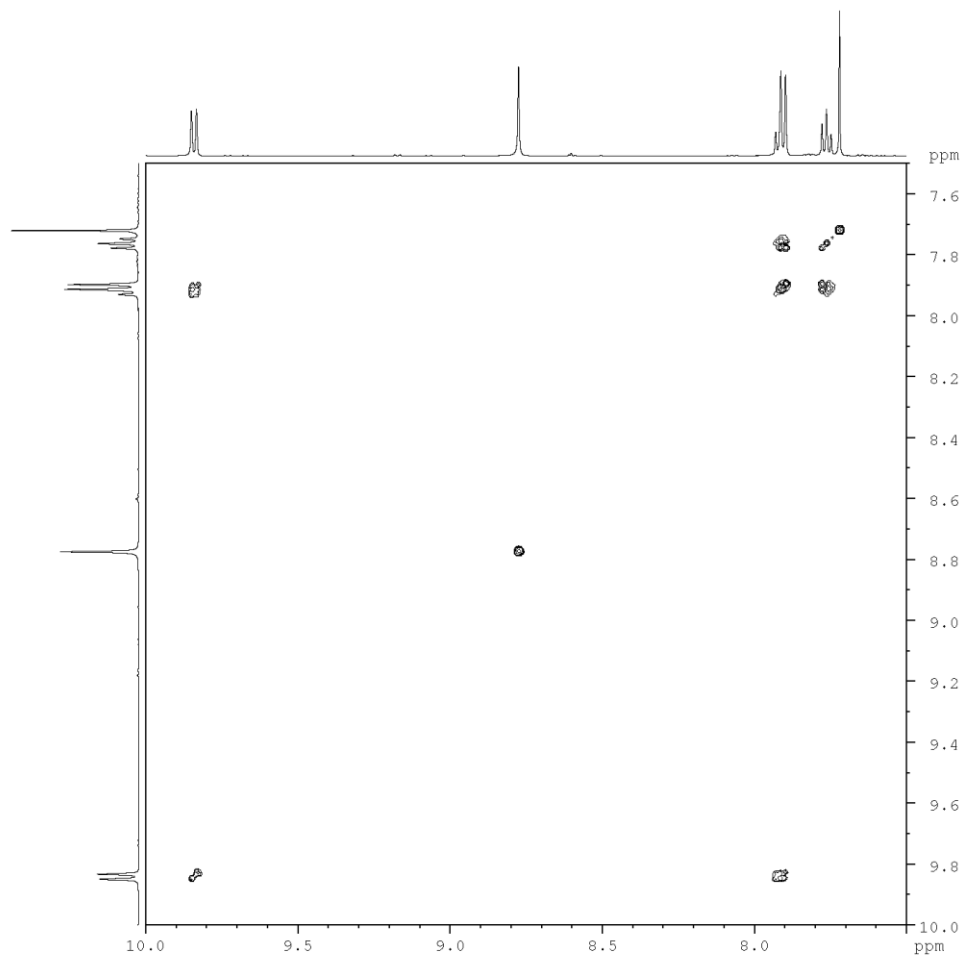

Figure S14: 2D-COSY 45 spectrum of the compound **5e**.

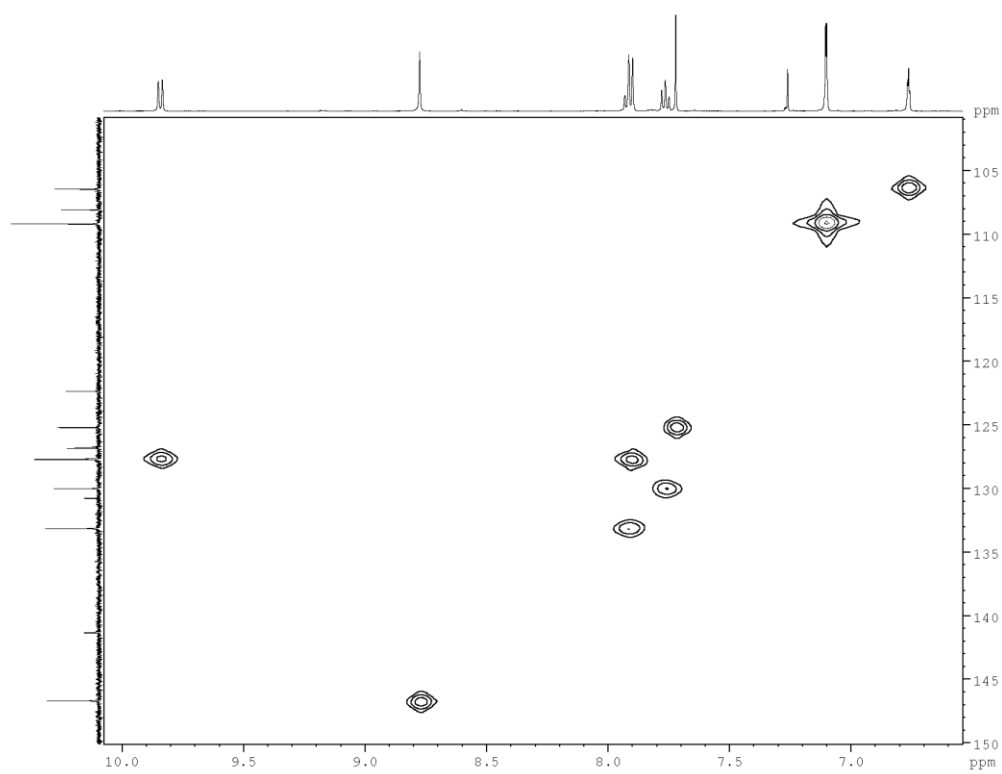

Figure S15: 2D-HETCOR (HMQC) spectrum of the compound **5e**.

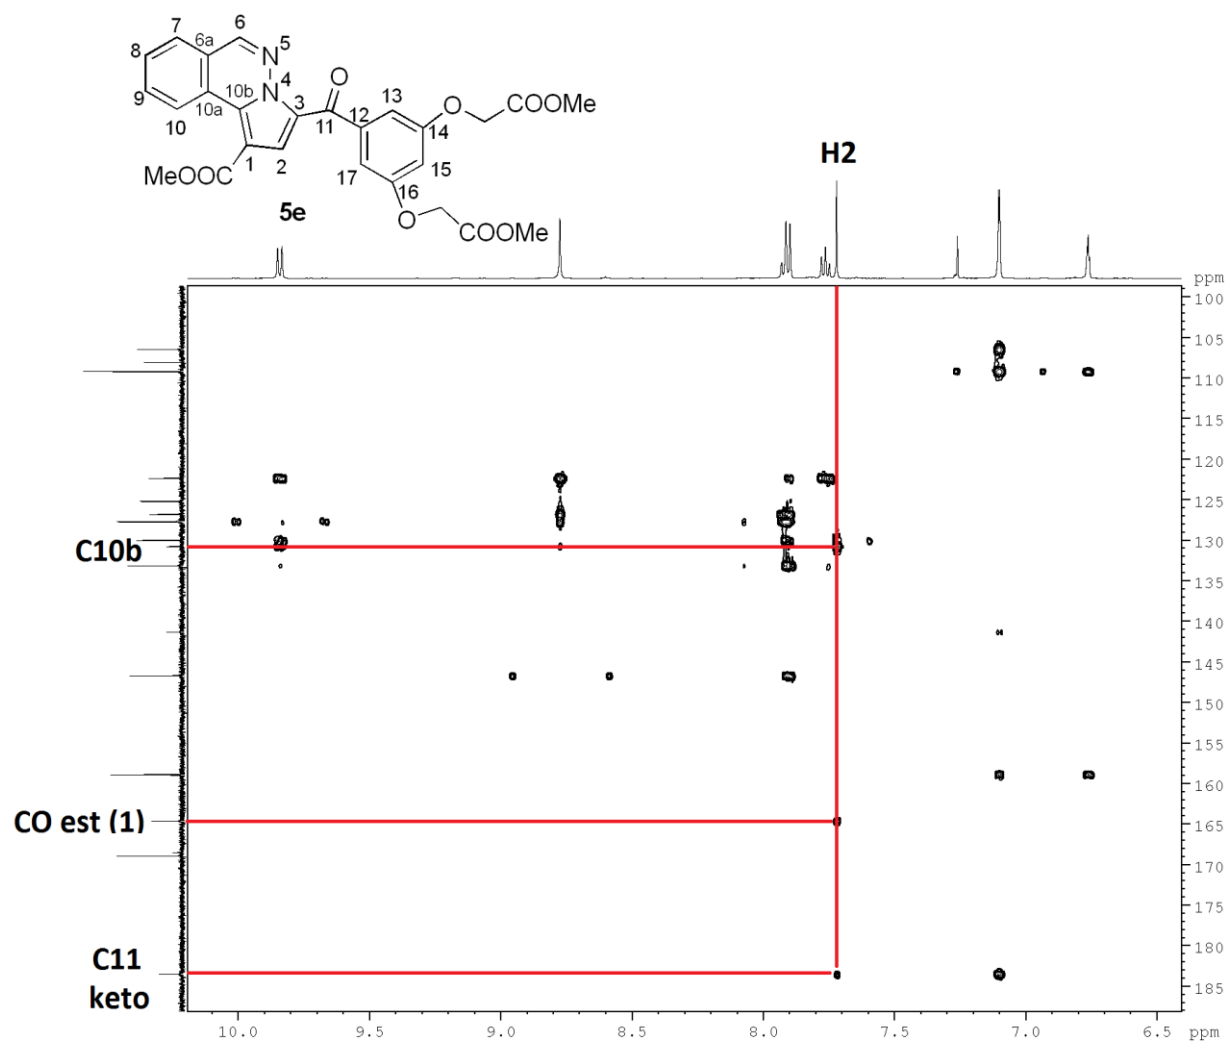

**Figure S16:** 2D-HETCOR (HMBC) spectrum of the compound **5e**.

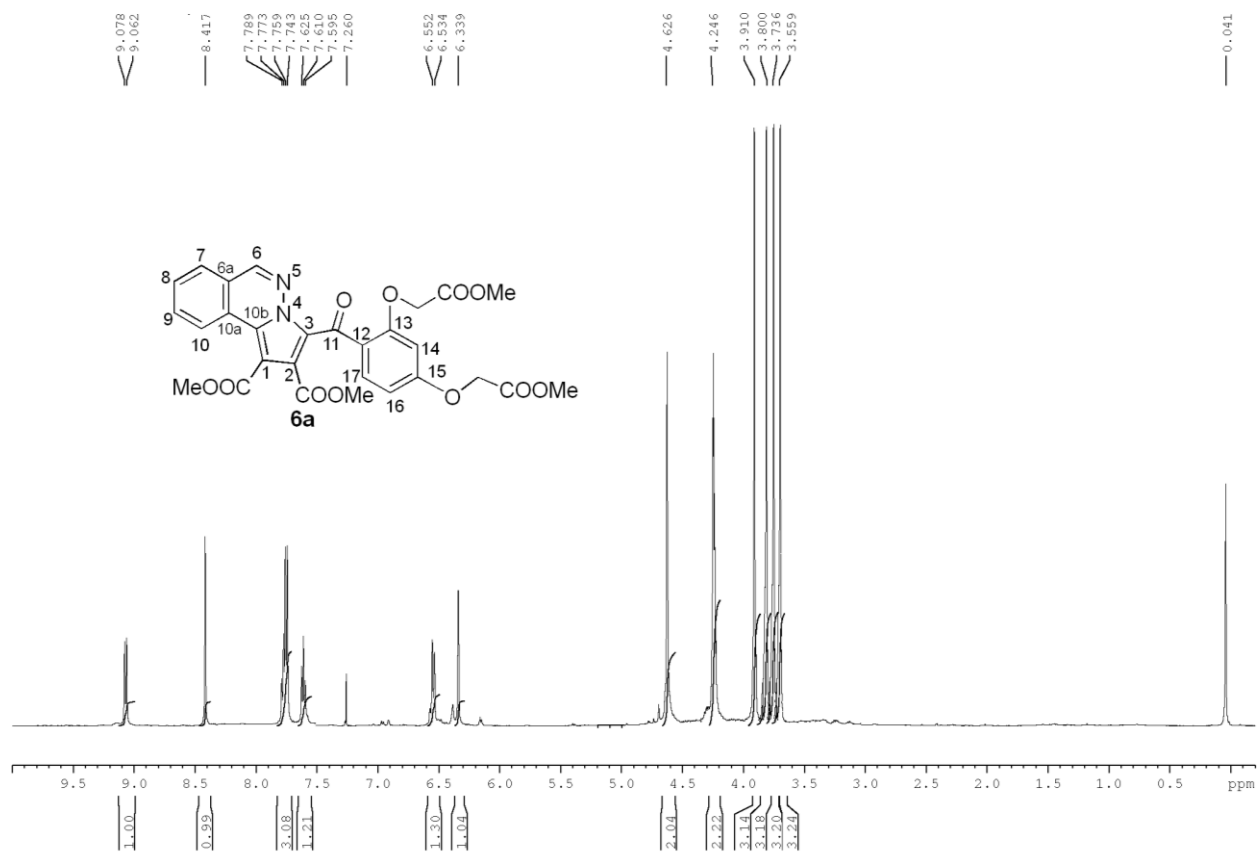

**Figure S17:** <sup>1</sup>H-NMR spectrum of the compound **6a**.

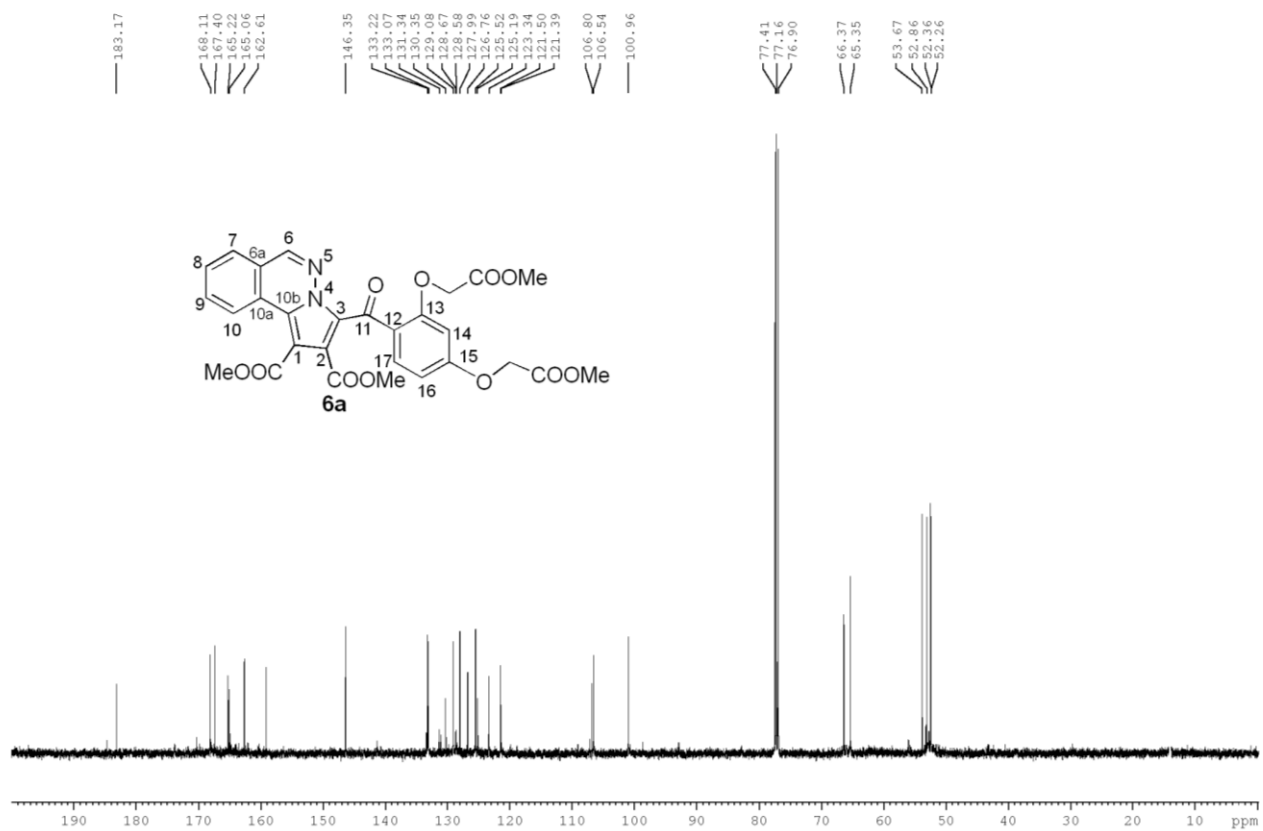

**Figure S18:** <sup>13</sup>C-NMR spectrum of the compound **6a**.

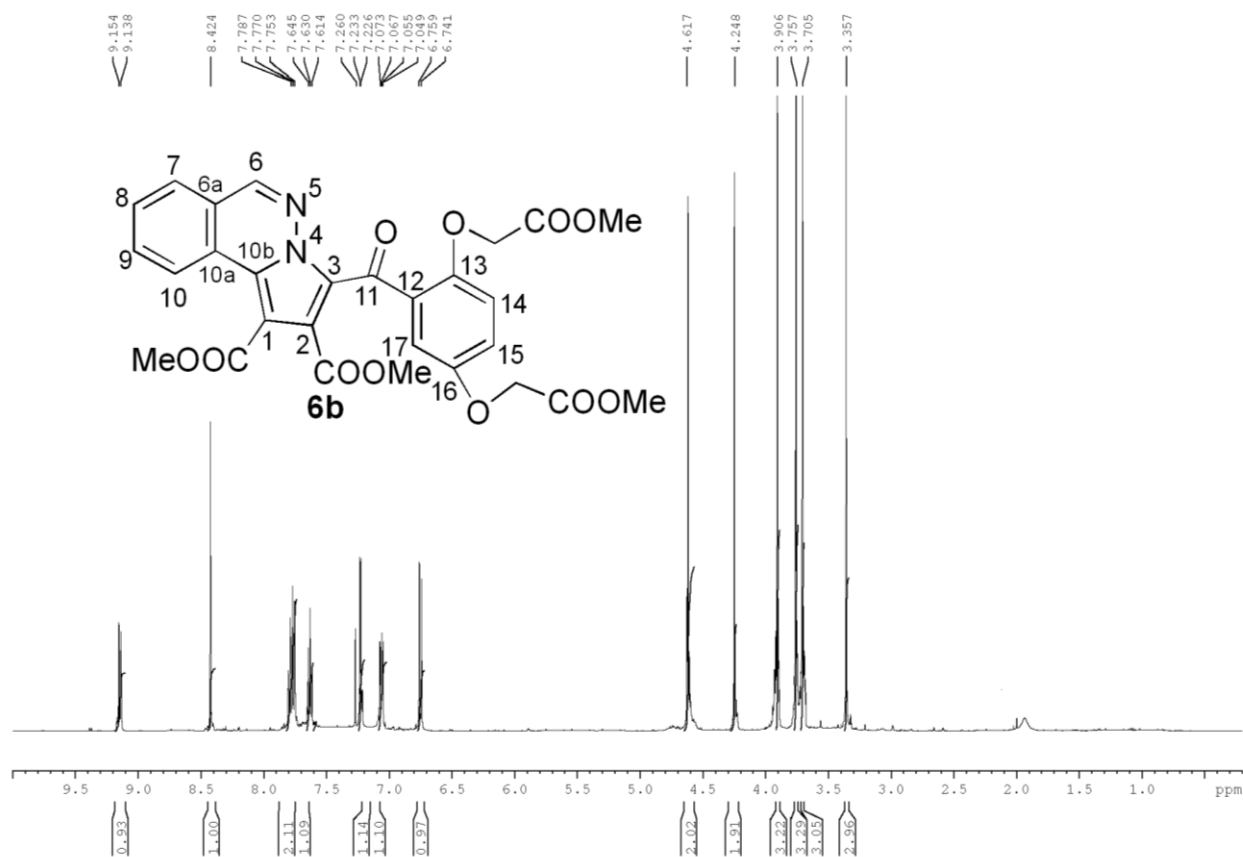

**Figure S19:** <sup>1</sup>H-NMR spectrum of the compound **6b**.

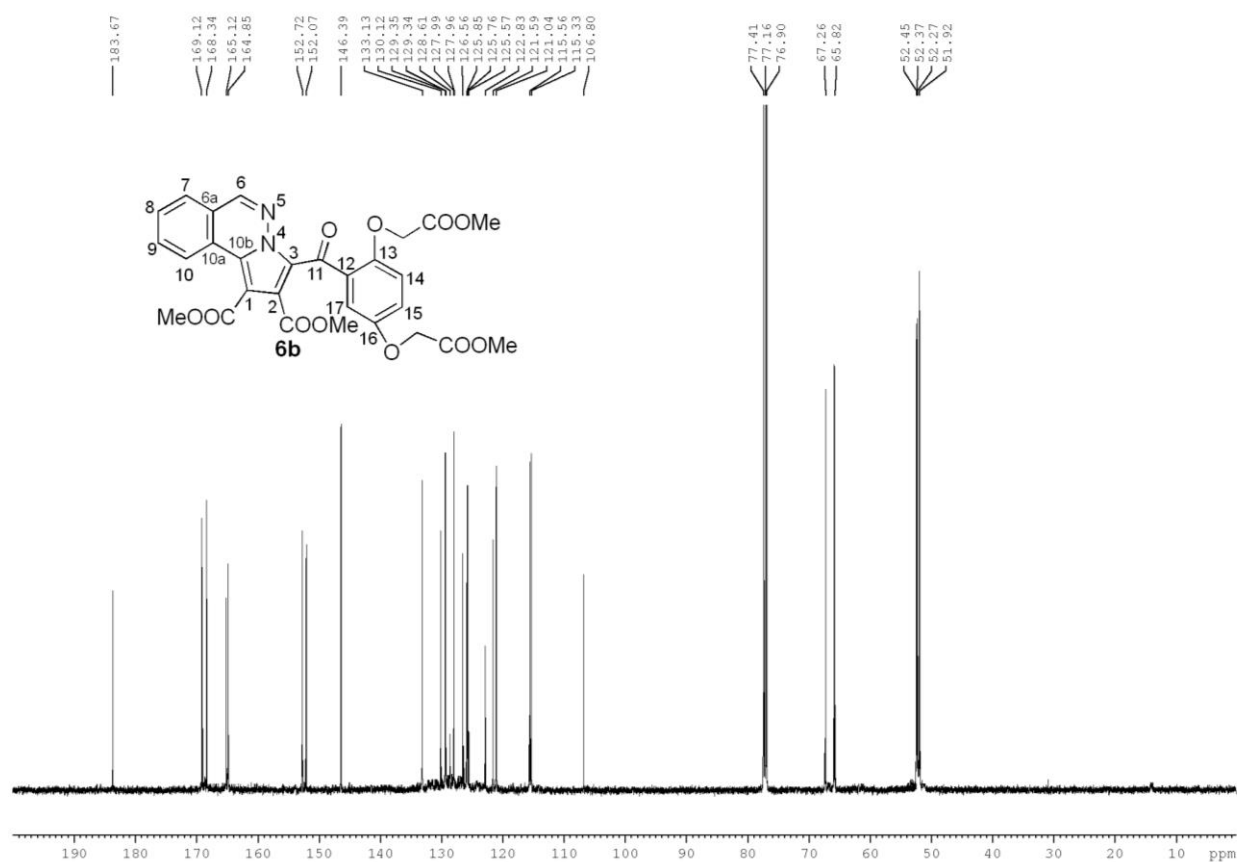

**Figure S20:** <sup>13</sup>C-NMR spectrum of the compound **6b**.

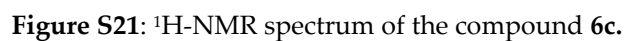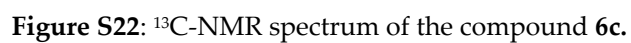

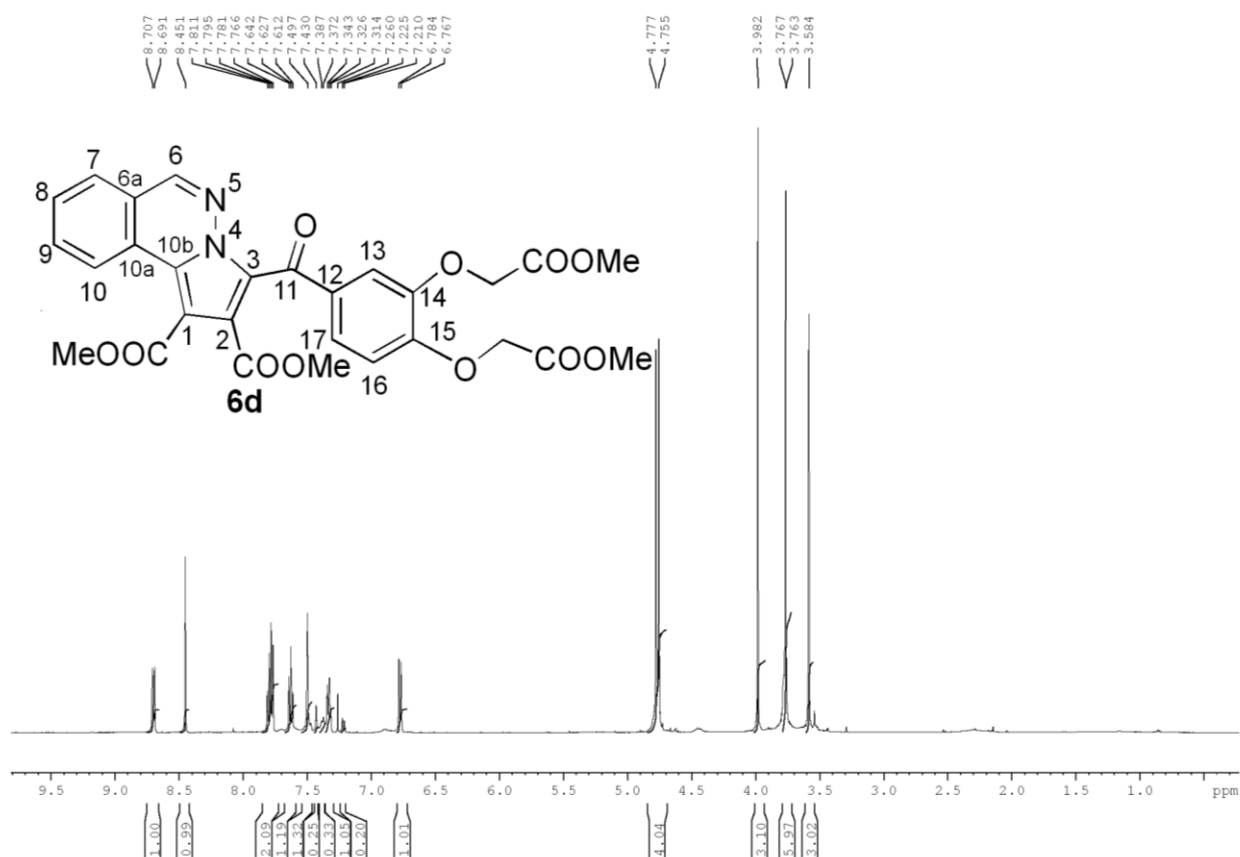

**Figure S23:** <sup>1</sup>H-NMR spectrum of the compound 6d.

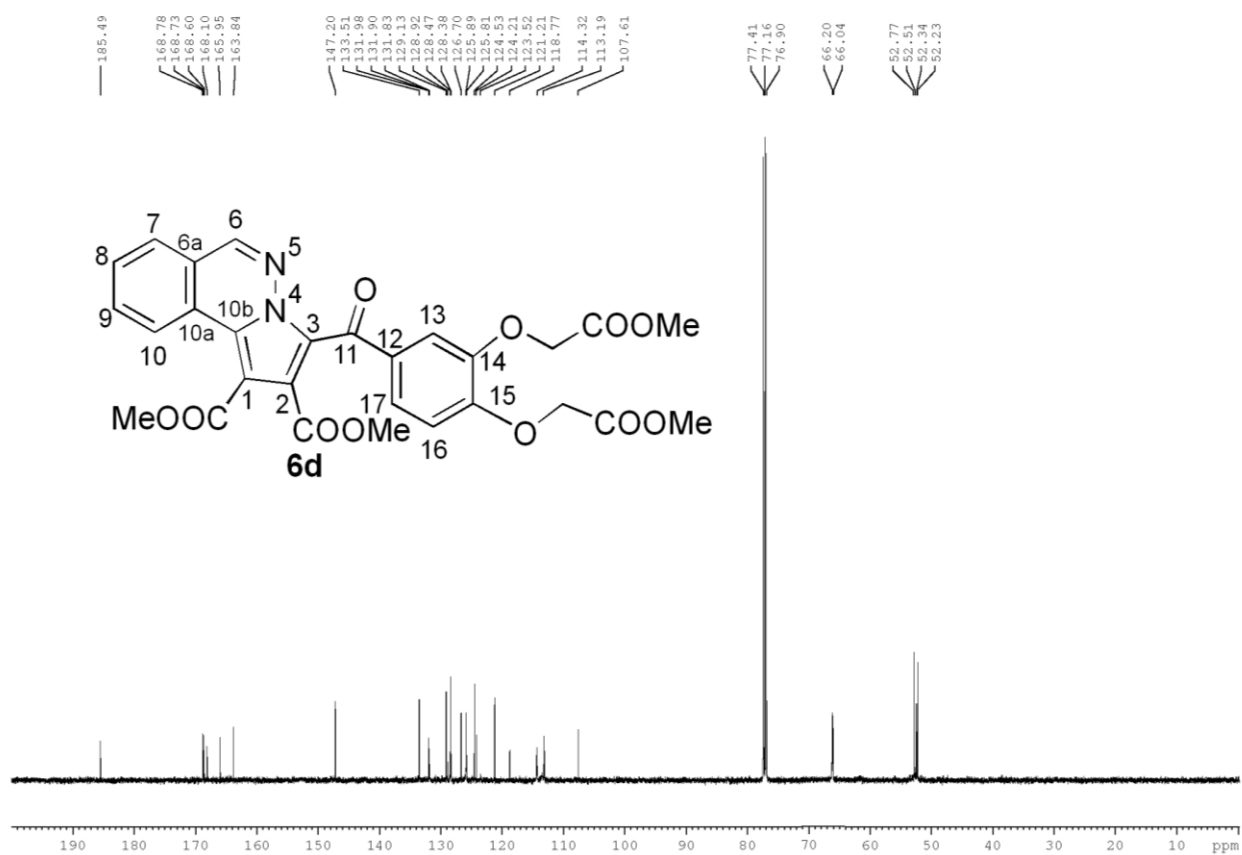

**Figure S24:** <sup>13</sup>C-NMR spectrum of the compound 6d.

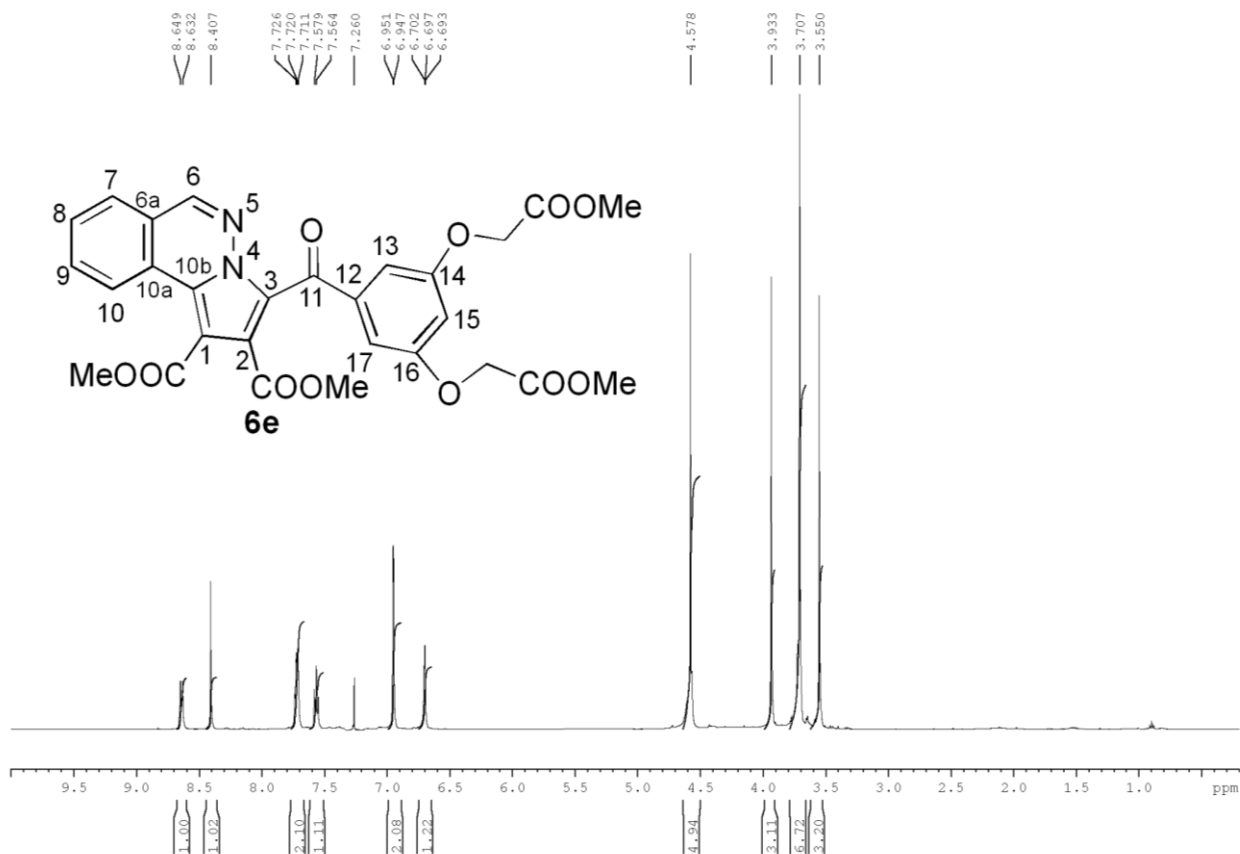

**Figure S25:** <sup>1</sup>H-NMR spectrum of the compound **6e**.

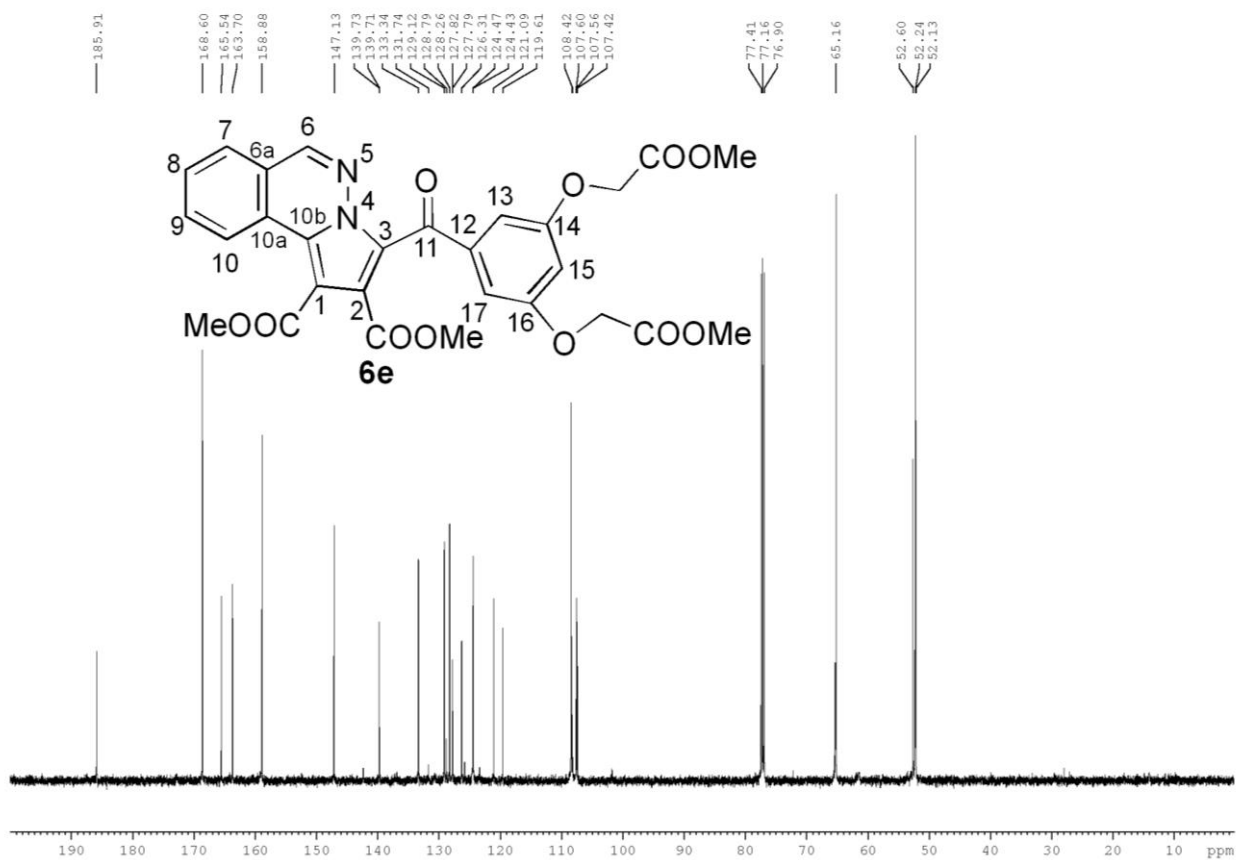

**Figure S26:** <sup>13</sup>C-NMR spectrum of the compound **6e**.
